# Supplementary material for: Selective detection of Hg2+ using fluorescent rhodamine-functionalized Fe3O4 nanoparticles
Source: Royal Society of Chemistry journal article supplement (doi:10.1039/c6ra16338f), 2016-01-01
Supplement: c6ra16338f1.pdf [file c6ra16338f1.pdf]

## **Electronic Supplementary Information (ESI)**

### Selective detection of Hg<sup>2+</sup> using fluorescent rhodamine-functionalized Fe<sub>3</sub>O<sub>4</sub> nanoparticles

Kyung Tae Kim,<sup>a</sup> Hyo Sung Jung,<sup>b,\*</sup> Junho Ahn,<sup>c</sup> Yeonweon Choi,<sup>c</sup> Jong Hwa Jung,<sup>c,\*</sup>  
Junbom Park<sup>a,\*</sup>

<sup>a</sup> Department of Civil and Environmental Engineering, Seoul National University, Seoul 151-744, Korea

<sup>b</sup> Department of Chemistry, Korea University, Seoul 136-701, Korea

<sup>c</sup> Department of Chemistry and Research Institute of Natural Science, Gyeongsang National University, Jinju, 660-701, Korea

\*Corresponding authors: junbark@snu.ac.kr (J. Park); jonghwa@gnu.ac.kr (J. H. Jung);  
hs0101j@korea.ac.kr (H. S. Jung)

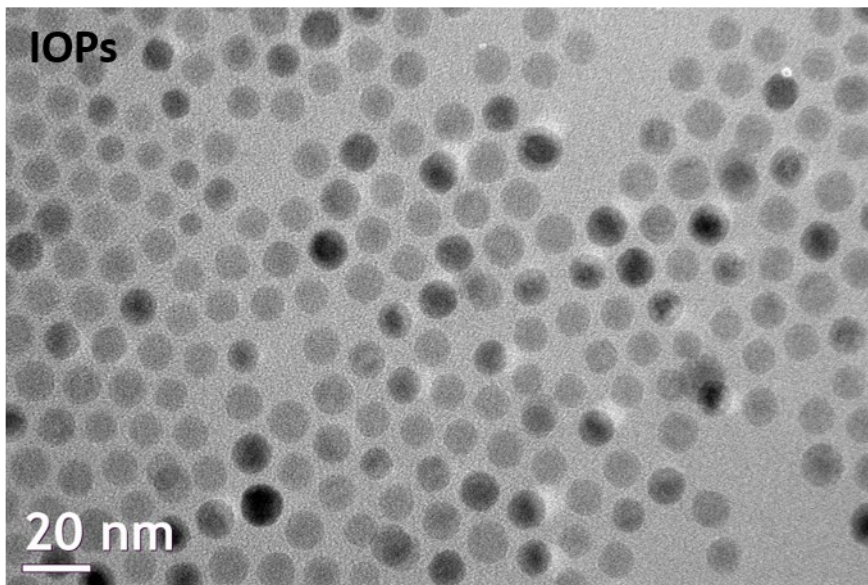

Fig. S1 TEM image of IOPs.

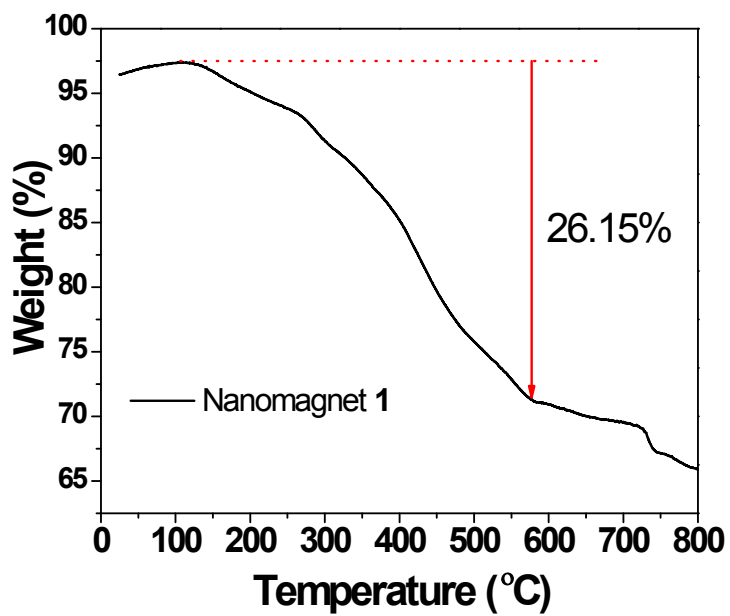

Fig. S2 TGA curve of 1.

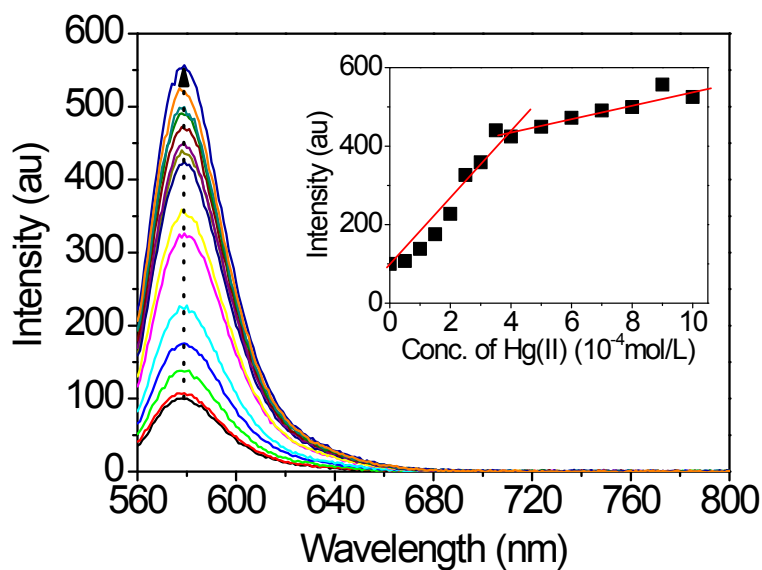

**Fig. S3** The fluorescence titration spectra of **2** (10  $\mu$ M) in the presence of increasing amounts of  $\text{Hg}^{2+}$  ions (0 to 400 equiv) in aqueous solution (HEPES:EtOH = 1:1, v/v; 0.01 M) at pH 7.4. Inset: fluorescence intensity at 579 nm as a function of equiv of  $\text{Hg}^{2+}$  ions.

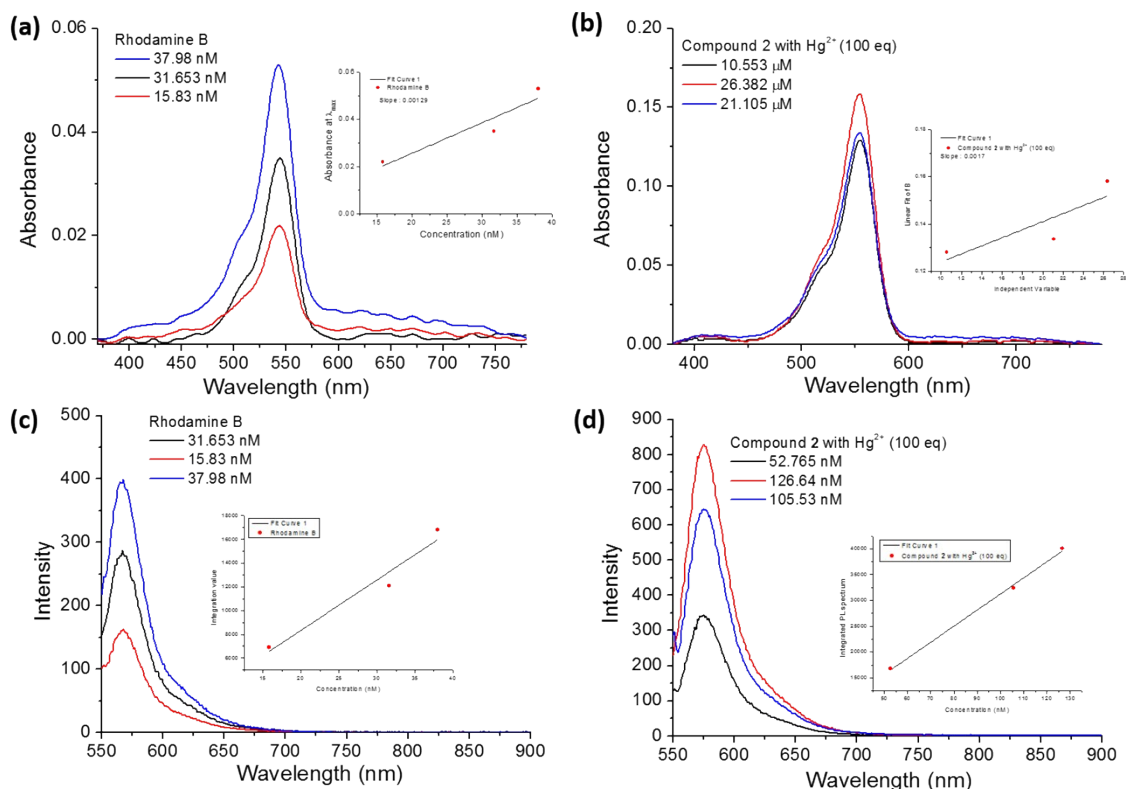

**Fig. S4** UV-Vis spectra of (a) rhodamine B and (b) compound **2** with  $\text{Hg}^{2+}$  (100 eq) in ethanol. Fluorescence spectra of (c) rhodamine B, (d) compound **2** with  $\text{Hg}^{2+}$  (100 eq) in ethanol.

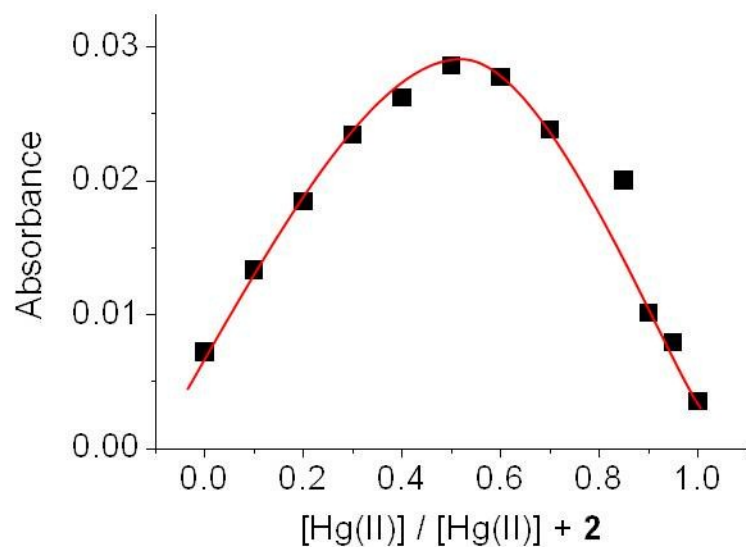

**Fig. S5** Job's plot for the complexation of **2** with  $\text{Hg}^{2+}$  ions in aqueous solution (HEPES:EtOH = 1:1, v/v; 0.01 M) at pH 7.4.

Line#:2 R.Time:0.475(Scan#:58)  
 MassPeaks:500  
 RawMode:Single 0.475(58) BasePeak:500.80(157643)  
 BG Mode:None Segment 1 - Event 2

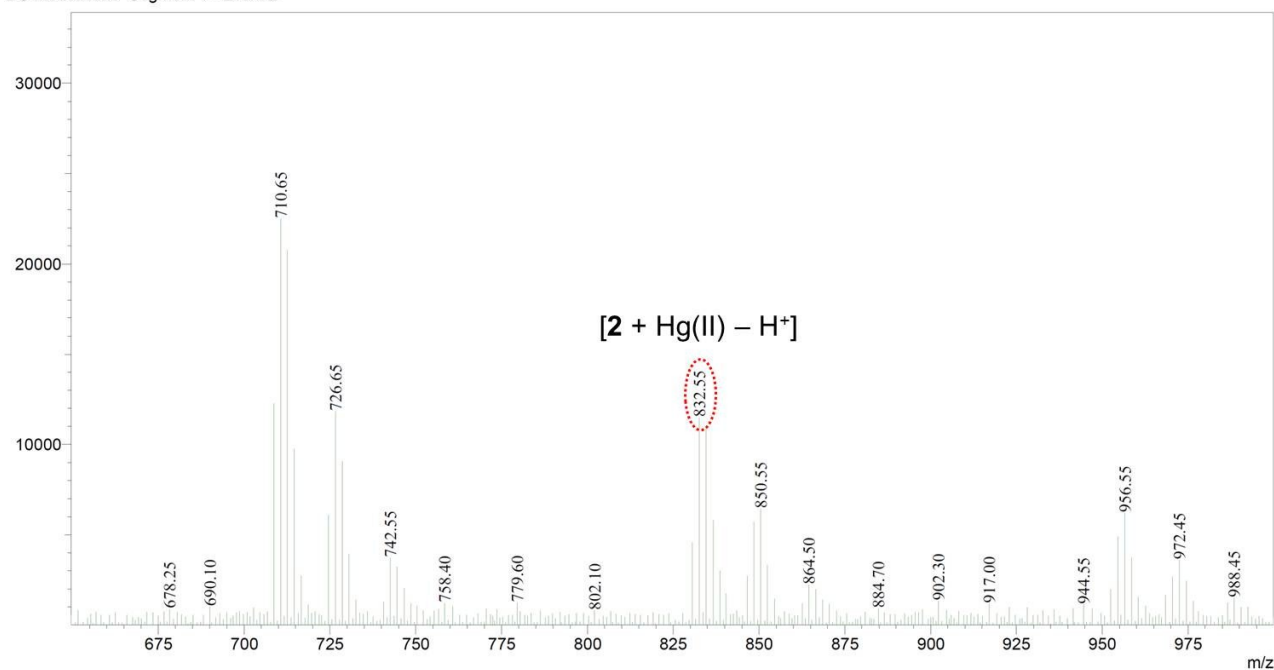

**Fig. S6** ESI-MS spectrum of **2**- $\text{Hg}^{2+}$ .

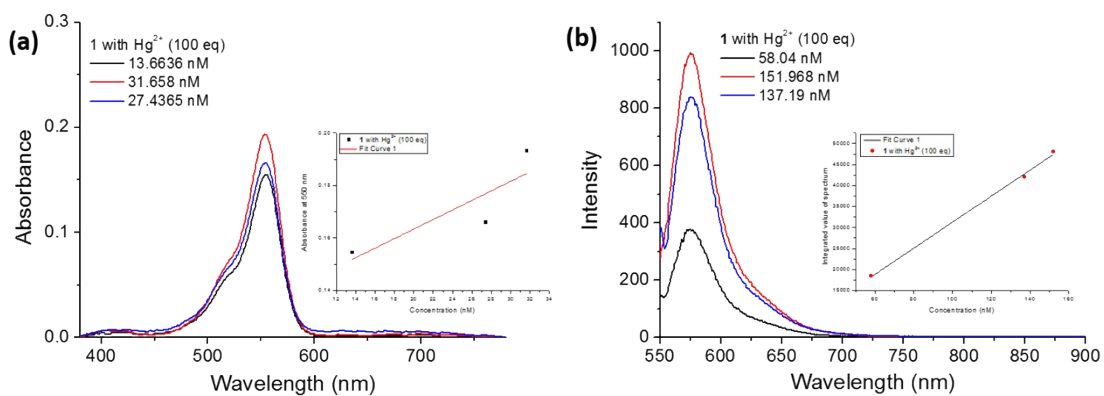

**Fig. S7** UV-vis spectra of (a) **1** with  $\text{Hg}^{2+}$  (100 eq) and (b) fluorescence spectra of **1** with  $\text{Hg}^{2+}$  (100 eq) in ethanol.

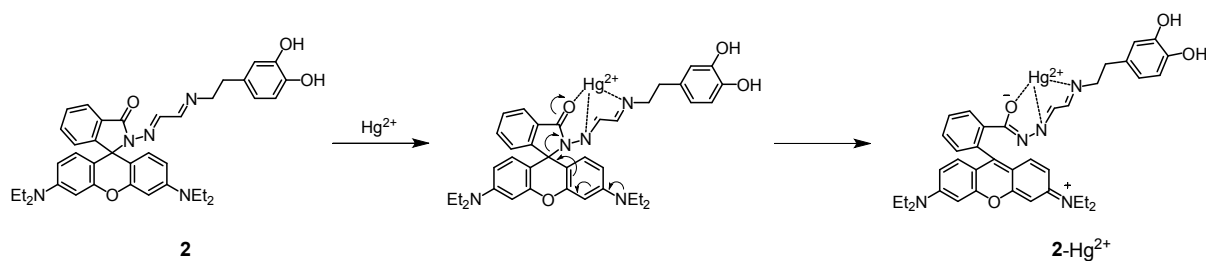

**Scheme S1** Proposed binding mechanism of **2** with  $\text{Hg}^{2+}$ .

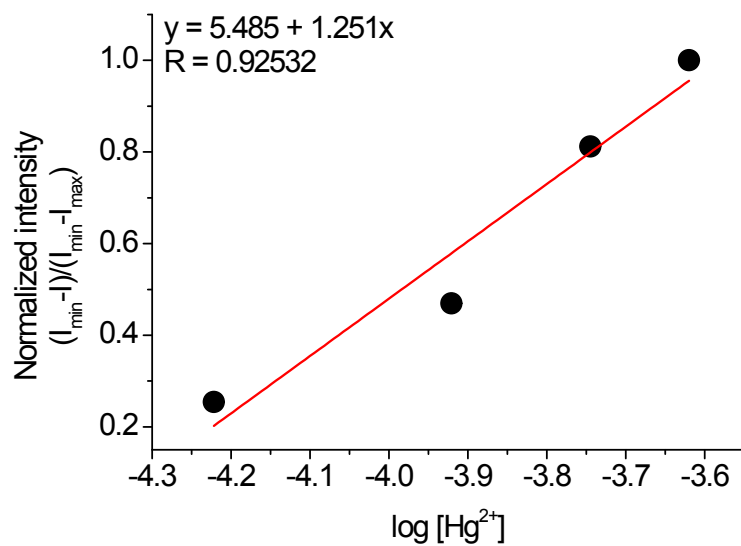

**Fig. S8** Fluorescence intensity of **1** plotted as a function of  $\text{Hg}^{2+}$  concentration (0  $\mu\text{M}$  – 240  $\mu\text{M}$ ). The detection limit was determined to be  $4.13 \times 10^{-5}$  M.

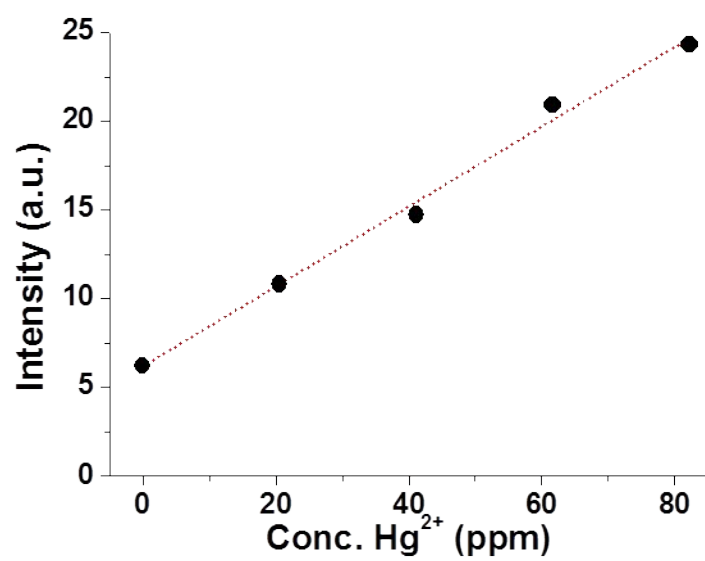

**Fig. S9** Fluorescence intensity of **1** plotted as a function of Hg<sup>2+</sup> concentration in urine samples.
